# Supplementary material
Source: ML conference proceedings conference paper supplement (https://www.ecva.net/papers/eccv_2020/papers_ECCV/html/123520511_ECCV_2020_paper.php)
Supplement: Supplementary file 1 [file 123520511-supp.zip]

# Supplementary material for TAFSSL: Task-Adaptive Feature Sub-Space Learning for few-shot classification

Anonymous ECCV submission

Paper ID 306

We include our source code as a supplementary material next to this README document. This code will be publicly released upon acceptance. It is possible to use this code to reproduce all the results reported in the paper.

The code depends on large data files that could not be included as part of the supplementary (due to 100MB size restriction), and could not be linked due to ECCV policy forbidding to include links in the supplementary. If accepted, these files will be linked for download in the public code. For completeness, we include instructions for re-building these files.

## The experiments corresponding to tables and figures in the paper

Table 1: Transductive setting

```
python exp_table.py
```

Table 2: Semi supervised setting

```
python exp_semi.py
```

Figure 2: Number of queries in transductive FSL setting

```
python exp_num_query.py
```

Figure 3: The affect of the unlabeled data noise on the performance

```
python exp_noise_semi.py
```

Figure 4: ICA dimension vs accuracy

```
python exp_projection_dim.py
```

Figure 5: Unbalanced

```
python exp_unbalanced.py
```

## Instructions re-building the large data files

- Download *miniImageNet* / *tieredImageNet*
- Generate splits:  

```
python src/utils/tieredImageNet.py --data path-to-tiered --split  
split/tiered/
```

– Pre-train a model and store the features:

python ./src/train.py -c <path to config file>

python ./src/train.py -c <path to config file> --save-features --enlarge
